# Supplementary material for: Fungal Communities in the Native New Zealand Medicinal Plant Pseudowintera colorata (Horopito) Are Determined by Plant Organ Type and Host Maturity with Key Members Promoting Plant Growth
Source: MDPI journal article supplement (doi:10.3390/microorganisms9122576), 2021-12-13
Supplement: s1 [file s1]

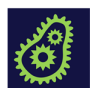

## Article

# Fungal Communities in the Native New Zealand Medicinal Plant *Pseudowintera colorata* (Horopito) Are Determined by Plant Organ Type and Host Maturity with Key Members Promoting Plant Growth

Neeraj Purushotham <sup>1,\*</sup>, Eirian Jones <sup>1</sup>, Jana Monk <sup>2</sup> and Hayley Ridgway <sup>1,3</sup>

<sup>1</sup> Department of Pest-management and Conservation, Faculty of Agriculture and Life Sciences, Lincoln University, Lincoln 7647, New Zealand; eirian.jones@lincoln.ac.nz (E.J.); Hayley.ridgway@plantandfood.co.nz (H.R.)

<sup>2</sup>ASUREQuality, Lincoln 7647, New Zealand; Jana.monk@outlook.com

<sup>3</sup> The New Zealand Institute for Plant and Food Research Limited, Christchurch 7608, New Zealand

\* Correspondence: neeraj@loambio.com

† Current address: Loam Bio., Orange 2800, Australia

## Supplementary Materials

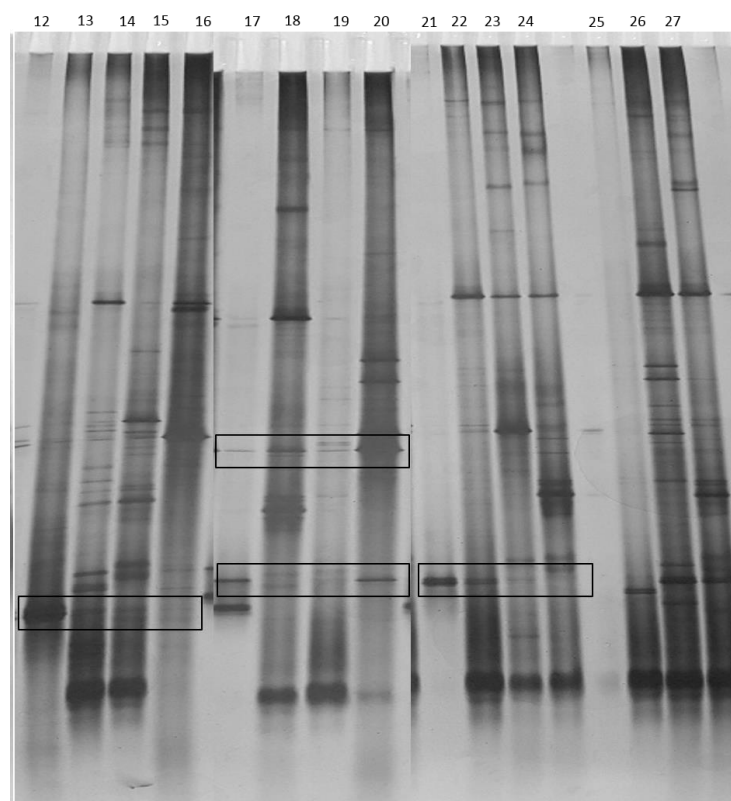

**Figure S1.** DGGE band patterns of pure cultures of endophytic fungi strains used as markers and DGGE band patterns of fungal communities (Lanes 12–27) obtained from roots of *P. colorata* seedling treated with the respective endophytes. Lane 12- blank Lane 13- *Metarhizium* sp. PR1SB1; Lanes 14–216 treatment PR1SB1; Lane 17- *Xylaria* sp. P4LA3; Lane 18–20 treatment P4LA3; Lane 21- *Fusarium* sp. P4LC2; Lanes 22–224 treatment P4LC2; Lanes 25–27 Control seedlings.
